# Supplementary material
Source: Springer Nature journal article supplement (https://www.springermedizin.de/resource/supplementary/12906_2013_1719_MOESM5_ESM.pdf/9522556)

# MCF-7

TH

OHT

TH + OHT

UT

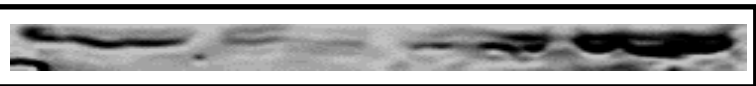

0.44

0.22

0.54

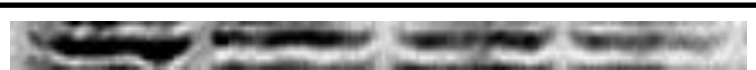

2.67

2.40

1.66

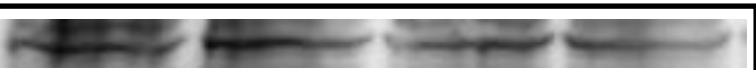

1.69

1.89

1.27

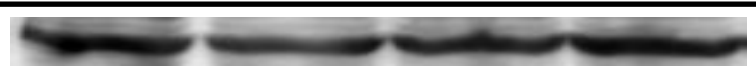

# MCF-10A

TH

OHT

TH + OHT

UT

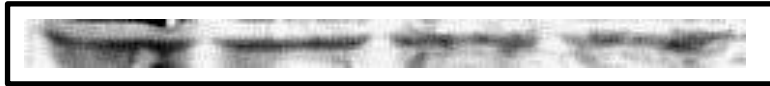

1.28

1.18

1.38

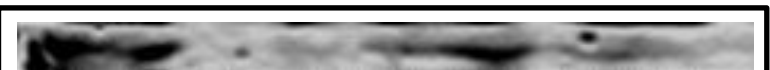

3.32

0.89

2.33

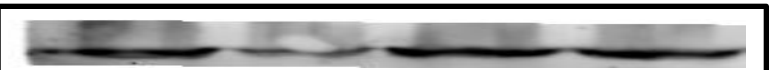

2.35

0.99

1.21

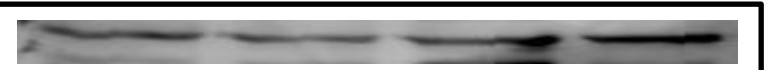

RAD51

Ku70

Ku80

$\beta$ - actin

Supplement: MOESM5 [file 9522556]
